# Supplementary material for: Organometallic anticancer agents that interfere with cellular energy processes: a subtle approach to inducing cancer cell death
Source: Royal Society of Chemistry journal article supplement (doi:10.1039/c2dt31936e), 2012-11-22
Supplement: c2dt31936e.pdf [file c2dt31936e.pdf]

## Organometallic anticancer agents that interfere with cellular energy processes: a subtle approach to inducing cancer cell death.

Alexey A. Nazarov<sup>\*a,b</sup>, Daniel Gardini<sup>a</sup>, Mathurin Baquié<sup>a</sup>, Lucienne Juillerat-Jeanneret<sup>c</sup>, Tatiana P. Serkova<sup>d</sup>, Elena P. Shevtsova<sup>d</sup>, Rosario Scopelliti<sup>a</sup> and Paul J. Dyson,<sup>\*a</sup>

### Supplementary Material

#### Synthesis

All solvents were purified and degassed prior to use.<sup>1</sup> <sup>1</sup>H and <sup>13</sup>C{<sup>1</sup>H} NMR spectra were recorded on a Bruker Avance II 400 spectrometer at room temperature and were referenced to the residual <sup>1</sup>H signal of the NMR solvent. ESI-mass spectra of the compounds were obtained in MeOH on a ThermoFinnigan LCQ Deca XP Plus quadrupole ion-trap instrument operated in positive ion mode over a mass range of m/z 150-1000. The ionization energy was set at 3.5 kV and the capillary temperature at 150 °C. Melting points were determined with a Stuart Scientific SMP3 apparatus and are uncorrected. The Varian 971-FP flash chromatography system was used for compound purification. Elemental analyses were carried out by the microanalytical laboratory at the EPFL.

#### *Synthesis of N-(3-(1H-imidazol-1-yl)propyl)-1-(2,4-dichlorobenzyl)-1H-indazole-3-carboxamide, 1*

A solution of 1-(2,4-dichlorobenzyl)-1H-indazole-3-carboxylic acid (2.0 g, 6.22 mmol), oxalyl chloride (10.7 mL) and a catalytic amount of DMF (0.1 mL) in CH<sub>2</sub>Cl<sub>2</sub> (100 mL) was heated under reflux for 2 h. Unreacted oxalyl chloride and solvent were removed under reduced pressure to yield 1-(2,4-dichlorobenzyl)-1H-indazole-3-carbonyl chloride as a yellow solid. N-(aminopropyl)imidazole (2.6 ml, 21.44 mmol) was added to a solution of the acid chloride in CH<sub>2</sub>Cl<sub>2</sub> (100 mL) and the reaction mixture was stirred for 6 h at room temperature. A solution of NaHCO<sub>3</sub> (5%, 120 mL) was added to quench the reaction and the aqueous phase was extracted with CH<sub>2</sub>Cl<sub>2</sub> (3 x 100 mL). The organic phases were combined and washed with brine (2 x 100 mL), dried over Na<sub>2</sub>SO<sub>4</sub>, and solvent was removed. The product was isolated by column chromatography on silica gel with EtOH/CH<sub>2</sub>Cl<sub>2</sub> 2:8 as eluent. Yield 1.98g (74 %), m.p. 121-122 °C, elem. anal. calcd (%) for C<sub>21</sub>H<sub>19</sub>Cl<sub>2</sub>N<sub>5</sub>O: C 58.89, H 4.47, N 16.35, found: C 58.55,

H 4.57, N 16.06.  $^1\text{H}$  NMR (400.13 MHz,  $\text{CDCl}_3$ )  $\delta$  8.41 (d, 1H,  $J = 8.1$  Hz,  $\text{H}_{\text{Ar}}$ ), 7.68 (brs, 1H; N-CH=N), 7.46 (d, 1H;  $J = 2.1$  Hz,  $\text{H}_{\text{Ar}}$ ), 7.31-7.45 (m, 3H;  $\text{H}_{\text{Ar}}$ ), 7.12 (brs, 1H, NH), 7.12 (dd, 1H,  $J = 8.5, 2.0$  Hz,  $\text{H}_{\text{Ar}}$ ), 7.10 (brs, 1H, CH=CH), 6.95 (brs, 1H, CH=CH), 6.66 (d, 1H,  $J = 8.5$  Hz;  $\text{H}_{\text{Ar}}$ ), 5.67 (s, 2H;  $\text{CH}_2$ ), 4.11 (t, 2H,  $J = 6.5$  Hz;  $\text{NHCH}_2\text{-CH}_2\text{-CH}_2\text{-N}$ ), 3.58 (q, 2H,  $J = 6.5$  Hz;  $\text{NHCH}_2\text{-CH}_2\text{-CH}_2\text{-N}$ ), 2.11 (m, 2H,  $\text{NHCH}_2\text{-CH}_2\text{-CH}_2\text{-N}$ ).  $^{13}\text{C}\{^1\text{H}\}$  NMR (100.63 MHz,  $\text{CDCl}_3$ )  $\delta$  162.8 (CO), 141.2 (N=C-C(O)), 138.2 ( $\text{C}_{\text{Ar}}$ ), 137.1 (N-CH=N), 134.5 ( $\text{C}_{\text{Ar}}$ ), 133.2 ( $\text{C}_{\text{Ar}}$ ), 132.3 ( $\text{C}_{\text{Ar}}$ ), 129.6 ( $\text{C}_{\text{Ar}}$ ), 129.5 ( $\text{C}_{\text{Ar}}$ ), 129.4 (CH=CH), 127.6 ( $\text{C}_{\text{Ar}}$ ), 127.5 ( $\text{C}_{\text{Ar}}$ ), 123.1 ( $\text{C}_{\text{Ar}}$ ), 122.9 ( $\text{C}_{\text{Ar}}$ ), 118.90 (CH=CH), 109.3 ( $\text{C}_{\text{Ar}}$ ), 50.0 ( $\text{CH}_2$ ), 44.6 (NH- $\text{CH}_2\text{-CH}_2\text{-CH}_2\text{-N}$ ), 36.2 (NH- $\text{CH}_2\text{-CH}_2\text{-CH}_2\text{-N}$ ), 31.5 (NH- $\text{CH}_2\text{-CH}_2\text{-CH}_2\text{-N}$ ); ESI-MS: m/z: 428  $[\text{M}+\text{H}^+]^+$ .

*Synthesis of dichlorido( $\eta^6$ -toluene)(N-(3-(1H-imidazol-1-yl)propyl)-1-(2,4-dichlorobenzyl)-1H-indazole-3-carboxamide) ruthenium(II), 2*

To a solution of N-(3-(1H-Imidazol-1-yl)propyl)-1-(2,4-dichlorobenzyl)-1H-indazole-3-carboxamide (**1**) (814 mg, 1.9 mmol) in  $\text{CH}_2\text{Cl}_2$  (30 mL), a solution of  $[(\eta^6\text{-toluene})\text{RuCl}(\mu\text{-Cl})_2]$  (483 mg, 0.91 mmol) in  $\text{CH}_2\text{Cl}_2$  (50 mL) was added and the mixture was stirred at room temperature for 12 h. The reaction mixture was concentrated to ~10 mL and pentane (150 mL) was added to precipitate the product. The orange solid was washed with pentane (2 x 20 mL) and ether (2 x 10 mL) and dried in vacuum. Yield 805 mg, (61 %). m.p. 174-175 °C decomp., elem. anal. calcd (%) for  $\text{C}_{28}\text{H}_{27}\text{Cl}_4\text{N}_5\text{ORu}$ : C 48.57, H 3.93, N 10.11, found: C 48.88, H 4.01, N 10.45.  $^1\text{H}$  NMR (400.13 MHz,  $\text{CDCl}_3$ )  $\delta$  8.35 (d, 1H,  $J = 8.1$  Hz;  $\text{H}_{\text{Ar}}$ ), 7.96 (brs, 1H; N-CH=N), 7.46-7.25 (m, 5 H;  $\text{H}_{\text{Ar}}$ , NH), 7.19 (brs, 1H; CH=CH), 6.75 (d, 1H,  $J = 8.2$  Hz;  $\text{H}_{\text{Ar}}$ ), 5.67 (s, 2H;  $\text{CH}_2$ ), 5.56 (d, 2H;  $J = 5.0$  Hz,  $\text{H}_{\text{Ar}}$ ), 5.36 (d, 2H,  $J = 5.0$  Hz;  $\text{H}_{\text{Ar}}$ ), 4.02 (tr, 2H,  $J = 6.5$  Hz;  $\text{NHCH}_2\text{-CH}_2\text{-CH}_2\text{-N}$ ), 3.50 (q, 2 H,  $J = 6.5$  Hz;  $\text{NHCH}_2\text{-CH}_2\text{-CH}_2\text{-N}$ ), 2.23 (s, 3H;  $\text{CH}_3$ ), 2.11 (m, 2H;  $\text{NHCH}_2\text{-CH}_2\text{-CH}_2\text{-N}$ );  $^{13}\text{C}\{^1\text{H}\}$  NMR (100.63 MHz,  $\text{CDCl}_3$ )  $\delta$  162.9 (C(O)), 141.2 (N=C-C(O)), 140.4 (N-CH=N), 138.0 ( $\text{C}_{\text{Ar}}$ ), 134.6 ( $\text{C}_{\text{Ar}}$ ), 133.3 ( $\text{C}_{\text{Ar}}$ ), 132.3 ( $\text{C}_{\text{Ar}}$ ), 132.1 ( $\text{C}_{\text{Ar}}$ ), 129.8 ( $\text{C}_{\text{Ar}}$ ), 129.5 (CH=CH), 127.8 ( $\text{C}_{\text{Ar}}$ ), 127.5 ( $\text{C}_{\text{Ar}}$ ), 123.1 ( $\text{C}_{\text{Ar}}$ ), 122.9 ( $\text{C}_{\text{Ar}}$ ), 122.8 ( $\text{C}_{\text{Ar}}$ ), 119.6 (CH=CH), 109.5 ( $\text{C}_{\text{Ar}}$ ), 99.5 ( $\text{C}_{\text{Ar}}$ ), 86.2 ( $\text{C}_{\text{Ar}}$ ), 81.2 ( $\text{C}_{\text{Ar}}$ ), 79.6 ( $\text{C}_{\text{Ar}}$ ), 77.3 ( $\text{C}_{\text{Ar}}$ ), 50.1 ( $\text{CH}_2$ ), 45.5 (NH- $\text{CH}_2\text{-CH}_2\text{-CH}_2\text{-N}$ ), 35.7 (NH- $\text{CH}_2\text{-CH}_2\text{-CH}_2\text{-N}$ ), 31.0 (NH- $\text{CH}_2\text{-CH}_2\text{-CH}_2\text{-N}$ ), 19.1 ( $\text{CH}_3$ ); ESI-MS: m/z: 658  $[\text{M}-\text{Cl}]^+$ .

*Synthesis of dichlorido( $\eta^6$ -p-cymene)(N-(3-(1H-imidazol-1-yl)propyl)-1-(2,4-dichlorobenzyl)-1H-indazole-3-carboxamide) ruthenium(II), **3***

To a solution of N-(3-(1H-Imidazol-1-yl)propyl)-1-(2,4-dichlorobenzyl)-1H-indazole-3-carboxamide (**1**) (1.0 g, 2.34 mmol) in CH<sub>2</sub>Cl<sub>2</sub> (30 mL), a solution of [( $\eta^6$ -p-cymene)RuCl( $\mu$ -Cl)]<sub>2</sub> (685 mg, 1.12 mmol) in CH<sub>2</sub>Cl<sub>2</sub> (50 mL) was added and the mixture was stirred at room temperature for 12 h. The reaction mixture was concentrated to ~10 mL and pentane (150 mL) was added to precipitate the product. The orange solid was washed with pentane (2 x 20 mL) and ether (2 x 10 mL) and dried in vacuum. Yield 875 mg (51 %). m.p. 144-145 °C decomp., elem. anal. calcd (%) for C<sub>31</sub>H<sub>33</sub>Cl<sub>4</sub>N<sub>5</sub>ORu: C 50.69, H 4.53, N 9.53, found: C 50.38, H 4.52, N 9.26. <sup>1</sup>H NMR (400.13 MHz, CDCl<sub>3</sub>)  $\delta$  8.38 (d, 1H, *J* = 7.8 Hz; H<sub>Ar</sub>), 7.96 (s, 1H; N-CH=N), 7.45 (d, 1H; *J* = 2.5 Hz; H<sub>Ar</sub>), 7.44-7.28 (m, 4H; H<sub>Ar</sub>, NH), 7.22 (brs, 1H; CH=CH), 7.16 (dd, 1H, *J* = 8.7, 2.5 Hz, H<sub>Ar</sub>), 6.97 (brs, 1H; CH=CH), 6.77 (d, 1H, *J* = 8.7 Hz; H<sub>Ar</sub>), 5.69 (s, 2H; CH<sub>2</sub>), 5.46 (d, 2H, *J* = 6.0 Hz; H<sub>Ar</sub>), 5.23 (d, 2H, *J* = 6.0 Hz; H<sub>Ar</sub>), 3.96 (tr, 2H, *J* = 6.8 Hz; NHCH<sub>2</sub>-CH<sub>2</sub>-CH<sub>2</sub>-N), 3.47 (q, 2H, *J* = 6.8 Hz; NHCH<sub>2</sub>-CH<sub>2</sub>-CH<sub>2</sub>-N), 2.97 (m, 1H; CH), 2.17 (s, 3H; CH<sub>3</sub>), 2.06 (m, 2H, NHCH<sub>2</sub>-CH<sub>2</sub>-CH<sub>2</sub>-N), 1.27 (d, 6H, *J* = 7.0 Hz; CH<sub>3</sub>); <sup>13</sup>C{<sup>1</sup>H} NMR (100.63 MHz, CDCl<sub>3</sub>)  $\delta$  162.9 (C(O)), 141.2 (N=C-C(O)), 140.2 (N-CH=N), 138.0 (C<sub>Ar</sub>), 134.9 (C<sub>Ar</sub>), 133.4 (C<sub>Ar</sub>), 132.3 (C<sub>Ar</sub>), 131.9 (C<sub>Ar</sub>), 129.8 (CH=CH), 129.6 (C<sub>Ar</sub>), 127.9 (C<sub>Ar</sub>), 127.1 (C<sub>Ar</sub>), 123.0 (C<sub>Ar</sub>), 119.5 (CH=CH), 109.4 (C<sub>Ar</sub>), 102.6 (C<sub>Ar</sub>), 97.7 (C<sub>Ar</sub>), 82.8 (C<sub>Ar</sub>), 81.4 (C<sub>Ar</sub>), 53.5 (C<sub>Ar</sub>), 50.1 (CH<sub>2</sub>), 45.5 (NH-CH<sub>2</sub>-CH<sub>2</sub>-CH<sub>2</sub>-N), 35.7 (NH-CH<sub>2</sub>-CH<sub>2</sub>-CH<sub>2</sub>-N), 31.0 (CH), 30.7 (NH-CH<sub>2</sub>-CH<sub>2</sub>-CH<sub>2</sub>-N), 22.3 (CH<sub>3</sub>), 18.5 (CH<sub>3</sub>); ESI-MS: m/z: 700 [M-Cl]<sup>+</sup>.

### X-ray crystallography of **2** and **3**

Data for **2** were collected at low temperature [140(2) K] using Mo *K*<sub>α</sub> radiation on a mar345dtb system in combination with a Genix Hi-Flux small focus generator (*marμX* system). The data reduction was carried out by *Automar*.<sup>2</sup> The diffraction data of **3** were measured at low temperature [100(2) K] using Mo *K*<sub>α</sub> radiation on a Bruker APEX II CCD diffractometer equipped with a kappa geometry goniometer. The dataset was reduced by EvalCCD<sup>3</sup> and then corrected for absorption<sup>4</sup>. The solutions and refinement were performed by SHELX.<sup>5</sup> The crystal

structures were refined using full-matrix least-squares based on  $F^2$  with all non hydrogen atoms anisotropically defined. Hydrogen atoms were placed in calculated positions by means of the “riding” model.

Crystal data and structure refinement for **2** and **3**.

|                                                   | <b>2</b>                                                                                                 | <b>3</b>                                                                                                |
|---------------------------------------------------|----------------------------------------------------------------------------------------------------------|---------------------------------------------------------------------------------------------------------|
| Empirical formula                                 | C <sub>30</sub> H <sub>29</sub> Cl <sub>10</sub> N <sub>5</sub> ORu                                      | C <sub>34</sub> H <sub>36</sub> Cl <sub>13</sub> N <sub>5</sub> ORu                                     |
| Formula weight                                    | 931.15                                                                                                   | 1092.60                                                                                                 |
| Temperature, K                                    | 140(2)                                                                                                   | 100(2)                                                                                                  |
| Wavelength, Å                                     | 0.71073                                                                                                  | 0.71073                                                                                                 |
| Crystal system                                    | Triclinic                                                                                                | Triclinic                                                                                               |
| Space group                                       | <i>P</i> -1                                                                                              | <i>P</i> -1                                                                                             |
| Unit cell dimensions                              | a = 10.029(2) Å α = 82.687(7)°<br>b = 10.7100(10) Å β =<br>87.155(10)°<br>c = 17.939(2) Å γ = 78.307(9)° | a = 17.4680(9) Å α = 90.501(8)°<br>b = 20.4319(15) Å β = 105.712(8)<br>c = 21.6099(16) Å γ = 112.689(9) |
| Volume, Å <sup>3</sup>                            | 1870.9(5)                                                                                                | 6794.0(8)                                                                                               |
| Z                                                 | 2                                                                                                        | 6                                                                                                       |
| Density (calculated),<br>mg/m <sup>3</sup>        | 1.653                                                                                                    | 1.602                                                                                                   |
| Absorption coefficient,<br>mm <sup>-1</sup>       | 1.167                                                                                                    | 1.148                                                                                                   |
| F(000)                                            | 932                                                                                                      | 3288                                                                                                    |
| Crystal size, mm <sup>3</sup>                     | 0.36 x 0.21 x 0.17                                                                                       | 0.36 x 0.18 x 0.14                                                                                      |
| Θ range for data<br>collection                    | 2.29 to 27.67°                                                                                           | 3.01 to 25.00°                                                                                          |
| Index ranges                                      | -12 ≤ h ≤ 12, -13 ≤ k ≤ 13, -<br>23 ≤ l ≤ 23                                                             | -20 ≤ h ≤ 20, -24 ≤ k ≤ 24, -25 ≤ l ≤ 25                                                                |
| Reflections collected                             | 14011                                                                                                    | 103178                                                                                                  |
| Independent reflections                           | 7900 [R(int) = 0.0211]                                                                                   | 23373 [R(int) = 0.1045]                                                                                 |
| Completeness to Θ<br>25.00°                       | 92.5 %                                                                                                   | 97.6 %                                                                                                  |
| Absorption correction                             | None                                                                                                     | Semi-empirical from equivalents                                                                         |
| Max. and min.<br>transmission                     |                                                                                                          | 0.7452 and 0.6476                                                                                       |
| Refinement method                                 | Full-matrix least-squares on F <sup>2</sup>                                                              | Full-matrix least-squares on F <sup>2</sup>                                                             |
| Data / restraints /<br>parameters                 | 7900 / 0 / 462                                                                                           | 23373 / 60 / 1459                                                                                       |
| Goodness-of-fit on F <sup>2</sup>                 | 1.083                                                                                                    | 1.105                                                                                                   |
| Final R indices [I ><br>2σ(I)]                    | R <sub>1</sub> = 0.0365, wR <sub>2</sub> = 0.0928                                                        | R <sub>1</sub> = 0.0622, wR <sub>2</sub> = 0.0817                                                       |
| R indices (all data)                              | R <sub>1</sub> = 0.0393, wR <sub>2</sub> = 0.0949                                                        | R <sub>1</sub> = 0.1202, wR <sub>2</sub> = 0.0967                                                       |
| Largest diff. peak and<br>hole, e Å <sup>-3</sup> | 0.537 and -0.661                                                                                         | 1.089 and -1.014                                                                                        |

## Cell Culture and Inhibition of Cell Growth

Human A2780 and A2780cisR ovarian carcinoma cells were obtained from the European Centre of Cell Cultures (ECACC, Salisbury, UK) and maintained in culture as described by the provider.

Human LN229 glioblastoma cells are available from the ATCC (American Tissue Culture Collection, Manassas, VA, USA). Human LN18 and LN2308 glioblastoma cells were a kind gift from AC Diserens, CHUV, Lausanne). Primary neuronal cultures from the cerebral cortex were obtained from embryos (E-18) of Wistar rats. Cultures were prepared according to a literature method.<sup>6</sup> Cultures were treated after the eight DIV with lonidamine or **1-3** at concentrations of 3 and 30  $\mu\text{M}$  (single application without feeding for 72 h). Cell damage was assessed using the MTT assay. The cells were grown in Dulbecco's Modified Eagle Medium (DMEM) medium containing 4.5 g/L glucose, 5% heat-inactivated fetal calf serum (FCS) and penicillin/streptomycin (all cell culture reagents were obtained from Invitrogen, Basel, Switzerland). Unless otherwise specified, cells were grown for 24 h in 48-well plates (Costar, Corning, NY, USA), then the compounds (stock solution in DMSO) were added for the indicated times and concentrations. DMSO final concentration never exceeded 1%; at concentrations below 1% DMSO has no effect on cell survival (results not shown). Following exposure to the compounds, cell viability was assessed using the MTT assay (3-(4,5-dimethyl-2-thiazoyl)-2,5-diphenyltetrazolium bromide, Sigma-Aldrich, 200  $\mu\text{g/ml}$  final concentration. Absorbance at 540 nm was measured in a multi-well plate reader (iEMS Reader, Labsystems, Bioconcept, Allschwil, Switzerland) and the absorbance values of treated cells were compared to the absorbance values of untreated cells. Experiments were conducted in duplicate wells and repeated at least twice.

## References

1. W. L. F. Armarego and C. Chai, *Purification of Laboratory Chemicals*, 5th edn., Butterworth-Heinemann, Oxford, 2003.
2. *Automar*, (2011) Marresearch GmbH, Germany.
3. A. J. M. Duisenberg, L. M. J. Kroon-Batenburg and A. M. M. Schreurs, *J. Appl. Crystallogr.*, 2003, **36**, 220-229.
4. R. H. Blessing, *Acta Crystallogr A*, 1995, **51**, 33-38.
5. G. M. Sheldrick, *Acta Crystallogr A*, 2008, **64**, 112-122.
6. M. Lautenschlager, M. V. Onufriev, N. V. Gulyaeva, C. Harms, D. Freyer, U. S. Sehmsdorf, K. Ruscher, Y. V. Moiseeva, A. Arnsward, I. Victorov, U. Dirnagl, J. R. Weber and H. Hörtnagl, *Neuroscience*, 2000, **97**, 383-393.
